# Supplementary material for: Predicting Response to Neuromodulators or Prokinetics in Patients With Suspected Gastroparesis Using Machine Learning: The “BMI, Infectious Prodrome, Delayed GES, and No Diabetes” Model
Source: PubMed Central journal article supplement — Clin Transl Gastroenterol. 2024 Jul 1;15(9):e1. doi: 10.14309/ctg.0000000000000743 (PMC11421729; doi:10.14309/ctg.0000000000000743), 2024-07-01

Supplemental Figure 1: AUC-ROC of the final model to predict a response to prokinetics or neuromodulators with the predictors Delayed GCSI, Diabetes, Infectious Prodrome and BMI. The AUC-ROC were 0.69 using lasso regression (blue line), 0.49 for random forest (gray line).

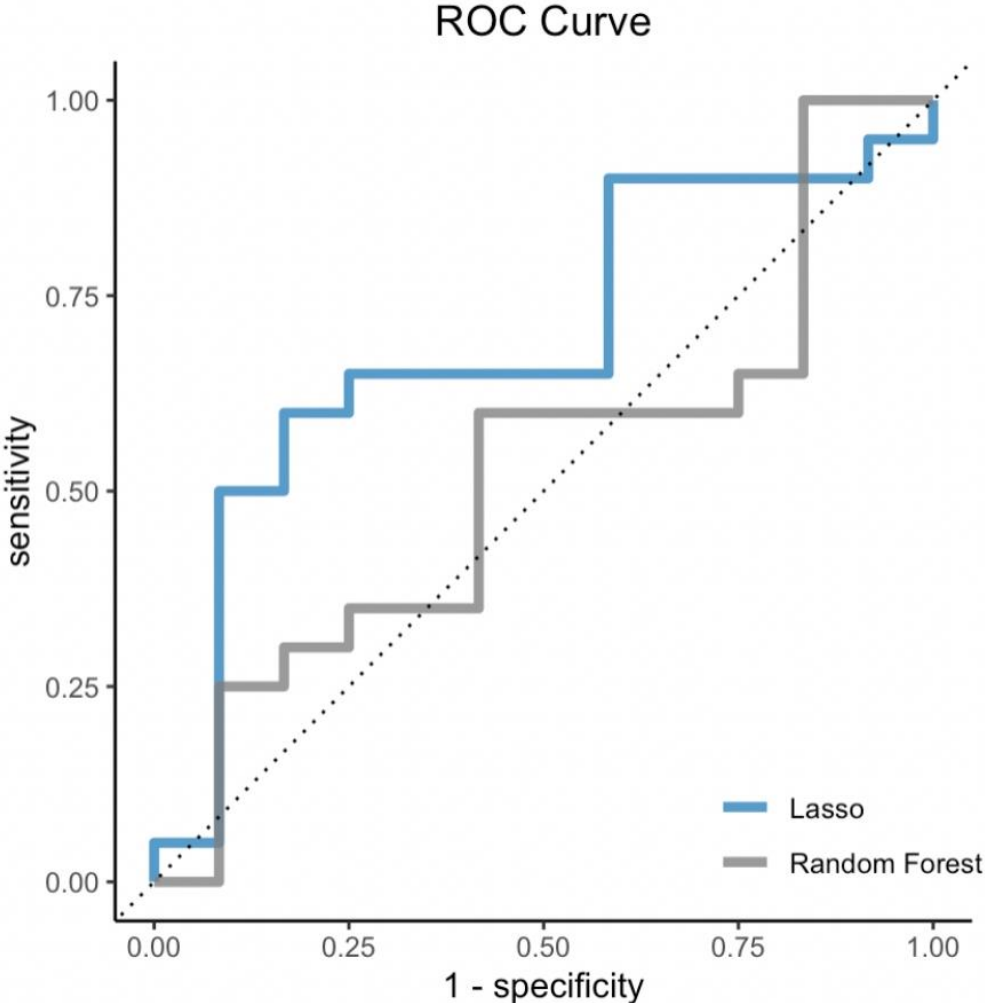

Supplement: ct9-15-e1f-s001.pdf [file ct9-15-e1f-s001.pdf]
