# Supplementary material for: Predicting Response to Neuromodulators or Prokinetics in Patients With Suspected Gastroparesis Using Machine Learning: The “BMI, Infectious Prodrome, Delayed GES, and No Diabetes” Model
Source: PubMed Central journal article supplement — Clin Transl Gastroenterol. 2024 Jul 1;15(9):e1. doi: 10.14309/ctg.0000000000000743 (PMC11421729; doi:10.14309/ctg.0000000000000743), 2024-07-01
Supplement: ct9-15-e1f-s002.pdf [file ct9-15-e1f-s002.pdf]

**Supplemental Table 1.**

| <b>Baseline variables</b>       | <b>Responder (n=45)</b> | <b>Non-Responder (n=78)</b> | <b>P-value</b> |
|---------------------------------|-------------------------|-----------------------------|----------------|
| Age                             | 43.0 (28.0-57.0)        | 44.5 (35.3-53.0)            | 0.63           |
| Female                          | 37 (82.2%)              | 61 (78.2%)                  | 0.59           |
| BMI                             | 27.9 (22.9-33.1)        | 25.7 (21.2-29.7)            | 0.14           |
| Marijuana                       | 4 (8.9%)                | 6 (7.7%)                    | 0.82           |
| Opioids                         | 4 (8.9%)                | 10 (12.8%)                  | 0.51           |
| Laxatives                       | 17 (38.8%)              | 27 (34.6%)                  | 0.72           |
| Antiemetics                     | 7 (15.6%)               | 8 (10.3%)                   | 0.39           |
| Gastroparesis Diet              | 14 (31.1%)              | 30 (38.5%)                  | 0.41           |
| Delayed GES                     | 9 (20.0%)               | 23 (29.8%)                  | 0.24           |
| Delayed GET                     | 19 (42.2%)              | 33 (42.3%)                  | 0.99           |
| GES retention at 4 hours        | 3 (1-7)                 | 3 (1-15)                    | 0.55           |
| GES retention at 2 hours        | 30.0 (15.0-48.0)        | 35.5 (22.3-53.0)            | 0.25           |
| GET                             | 4.4 (3.2-6.1)           | 4.4 (3.5-6.8)               | 0.65           |
| Small bowel transit time        | 4.7 (3.4-6.1)           | 4.7 (3.8-5.8)               | 0.7            |
| Colonic transit time            | 42.7 (21.0-70.8)        | 35.9 (16.1-63.2)            | 0.32           |
| Number of antral contractions   | 41.0 (24.0-88.0)        | 46 (25.0-86.5)              | 0.65           |
| Antral motility index           | 11.1 (10.0-12.6)        | 11.3 (10.1-12.6)            | 0.97           |
| Number of duodenal contractions | 108.0 (61.0-166.0)      | 91.5 (42.8-168.3)           | 0.92           |
| Duodenal motility index         | 12.5 (11.2-13.8)        | 12.3 (10.6-13.4)            | 0.39           |
| Infectious prodrome             | 2 (4.4%)                | 13 (16.7%)                  | 0.06           |
| Duration                        | 36 (12-72)              | 36 (24-108)                 | 0.4            |
| Diabetes                        | 17 (37.8%)              | 16 (20.5%)                  | <b>0.04</b>    |
| BSS                             | 4 (3-5)                 | 4 (2-6)                     | 0.87           |
| Functional Bowel Disorder       | 36 (81.8%)              | 60 (80.0%)                  | 0.81           |
| Constipation                    | 15 (34.9%)              | 25 (33.8%)                  | 0.9            |
| Functional Dyspepsia            | 34 (77.3%)              | 55 (74.3%)                  | 0.72           |
| Nausea Vomiting and Belching    | 31 (70.5%)              | 44 (59.5%)                  | 0.23           |
| <b>GCSI</b>                     |                         |                             |                |
| Baseline GCSI                   | 2.7 (2.0-3.1)           | 3.1 (2.5-3.5)               | 0.005          |
| GCSI at 6 months                | 1.2 (0.8-1.8)           | 2.8 (2.0-3.6)               | <0.0001        |

**Supplemental Table 1.** Baseline variables which were evaluated in order to be included in the predictive model and GSCI at baseline and 6 months. The initial model included all variables with  $p < 0.25$  which are BMI, Delayed GES, Infectious prodrome, Diabetes, Nausea, Vomiting, and Belching.
